# Supplementary figures and images for: New insights into the protein stabilizing effects of trehalose by comparing with sucrose
Source: Royal Society of Chemistry journal article supplement (doi:10.1039/d3cp02639f), 2023-01-01

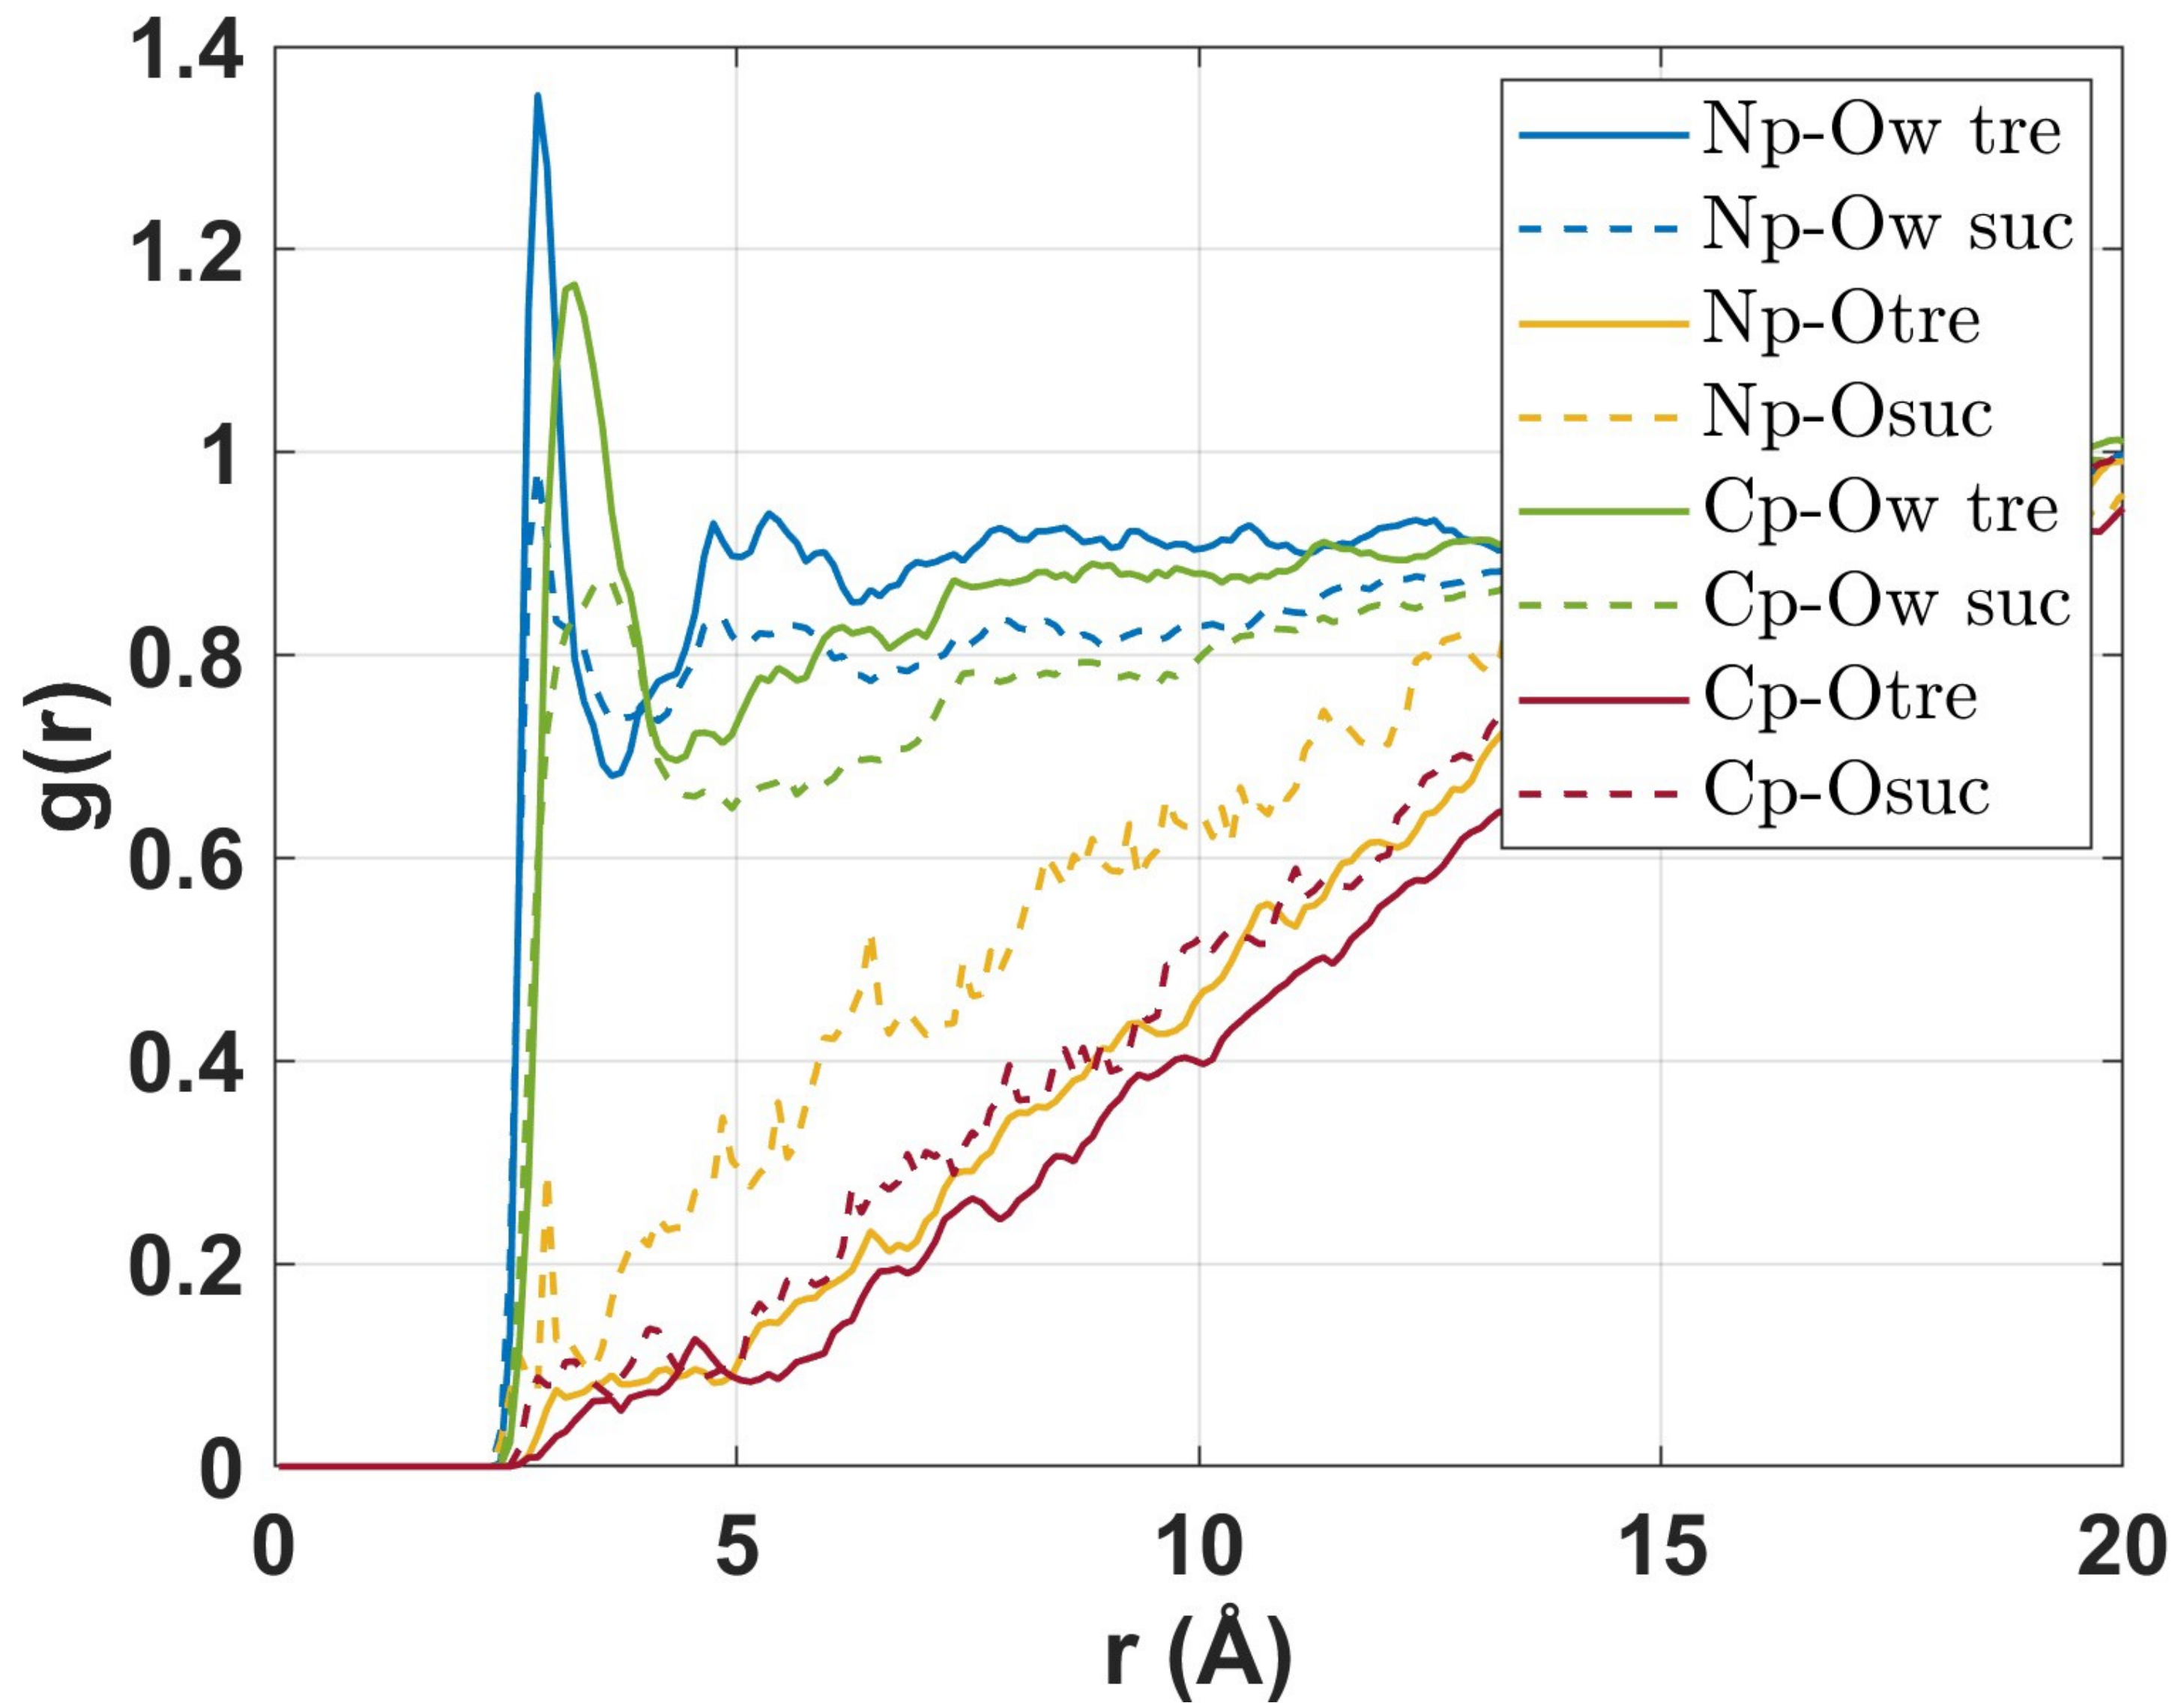

Supplement: d3cp02639f1.pdf [file d3cp02639f1.pdf]

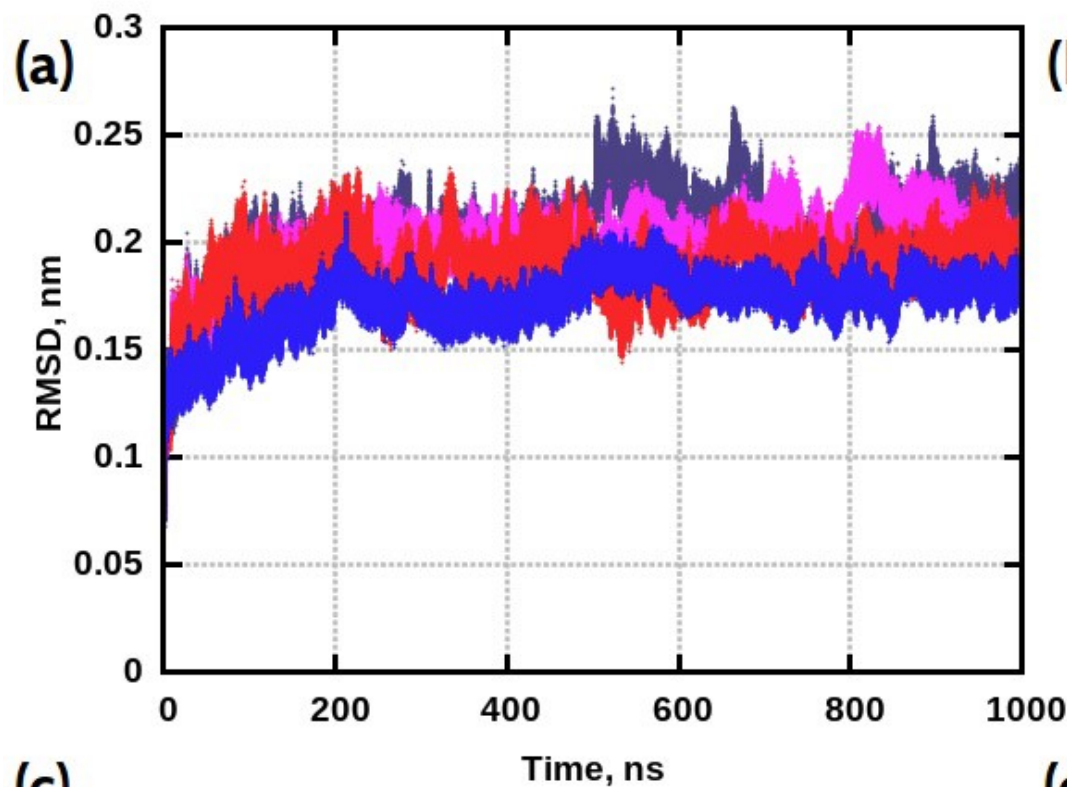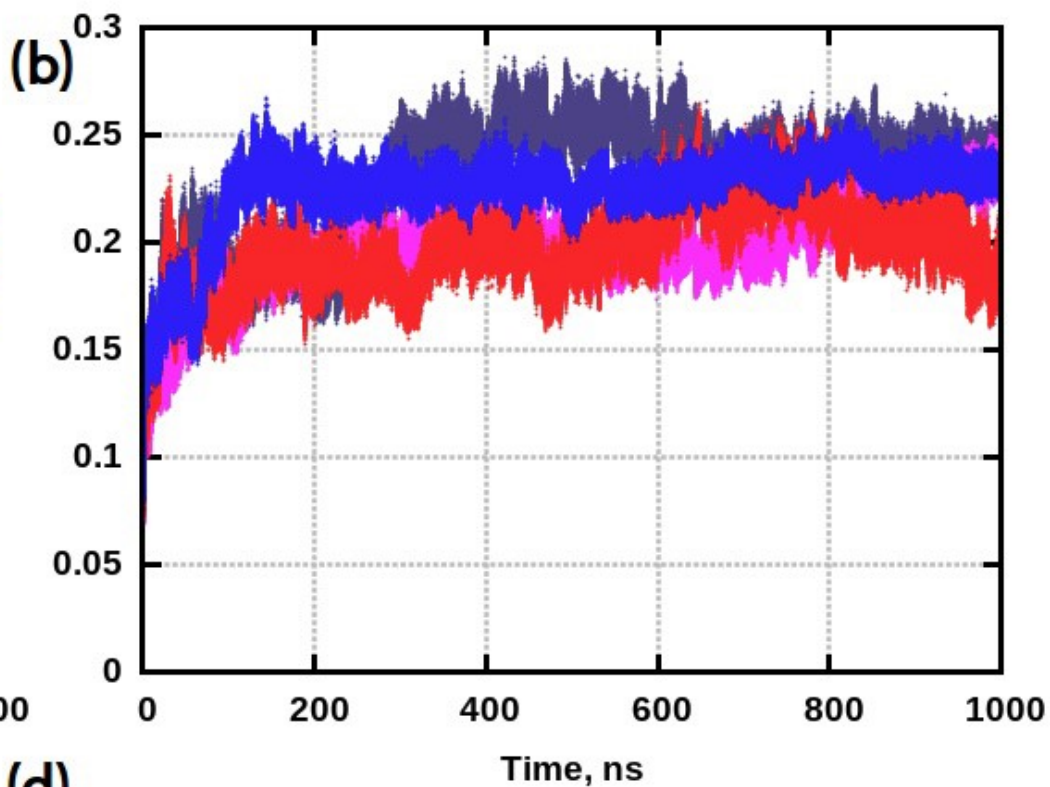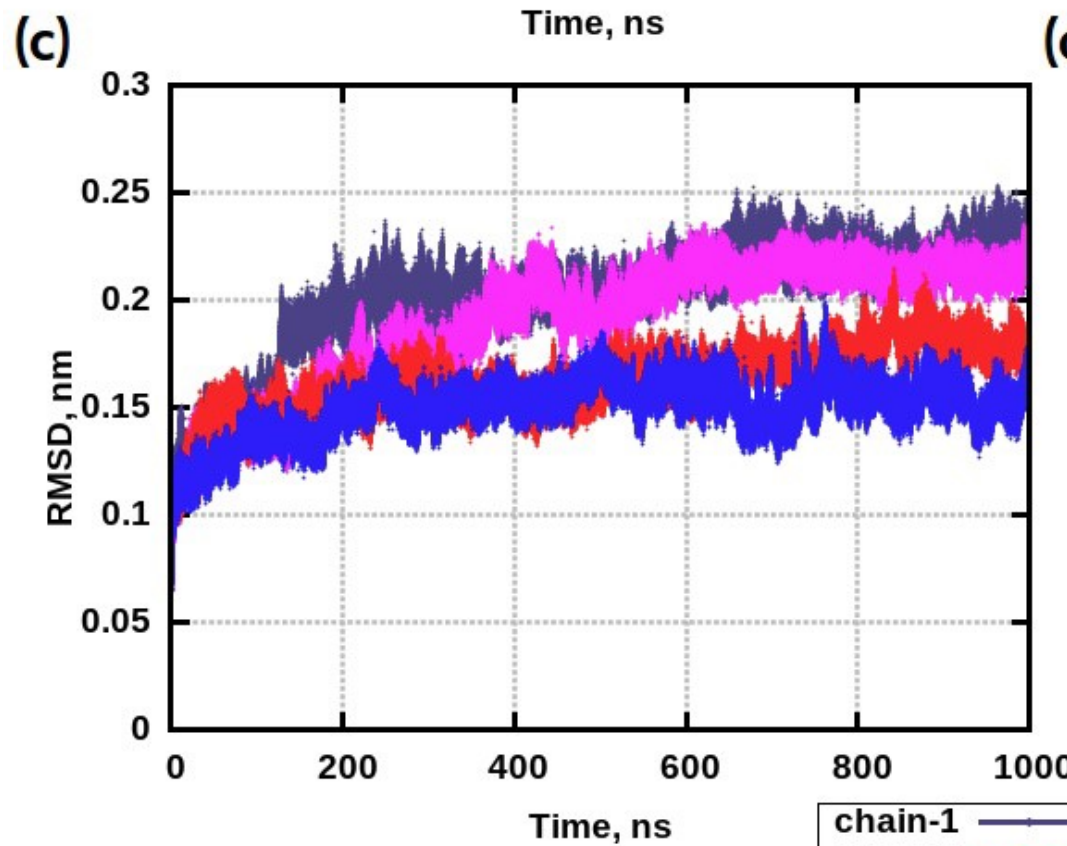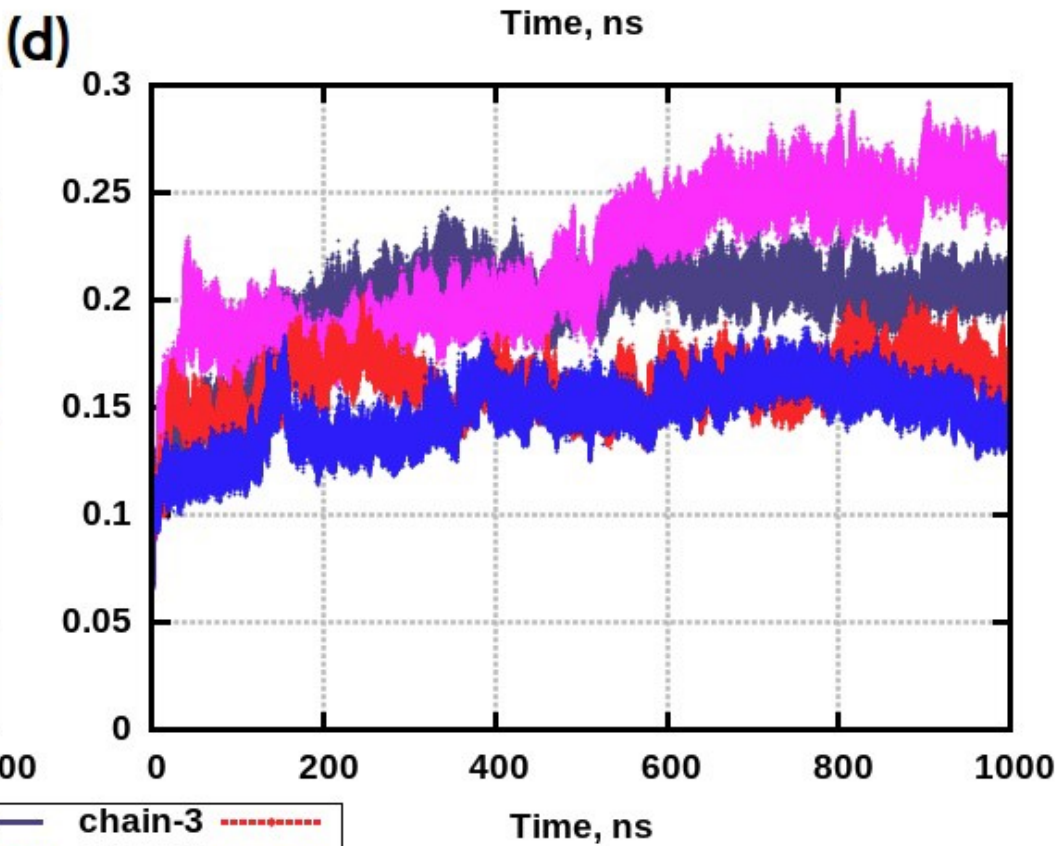

chain-1 ——— chain-3 ·····  
chain-2 - - - - chain-4 - · - · -

Supplement: d3cp02639f2.pdf [file d3cp02639f2.pdf]

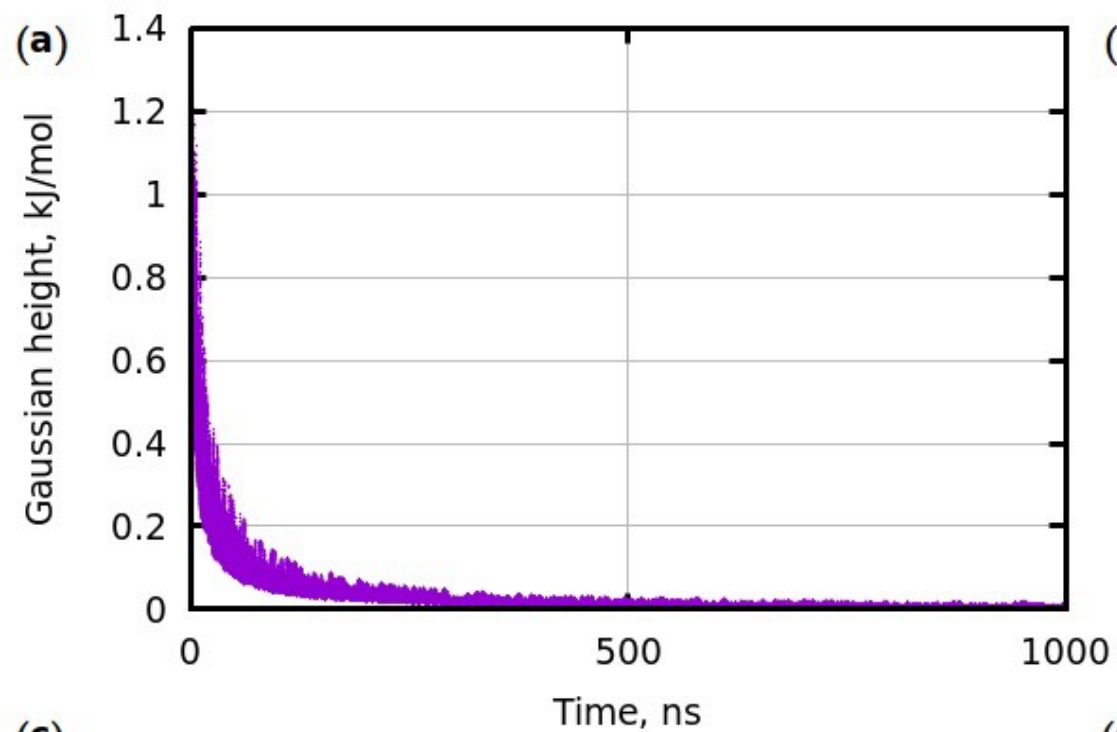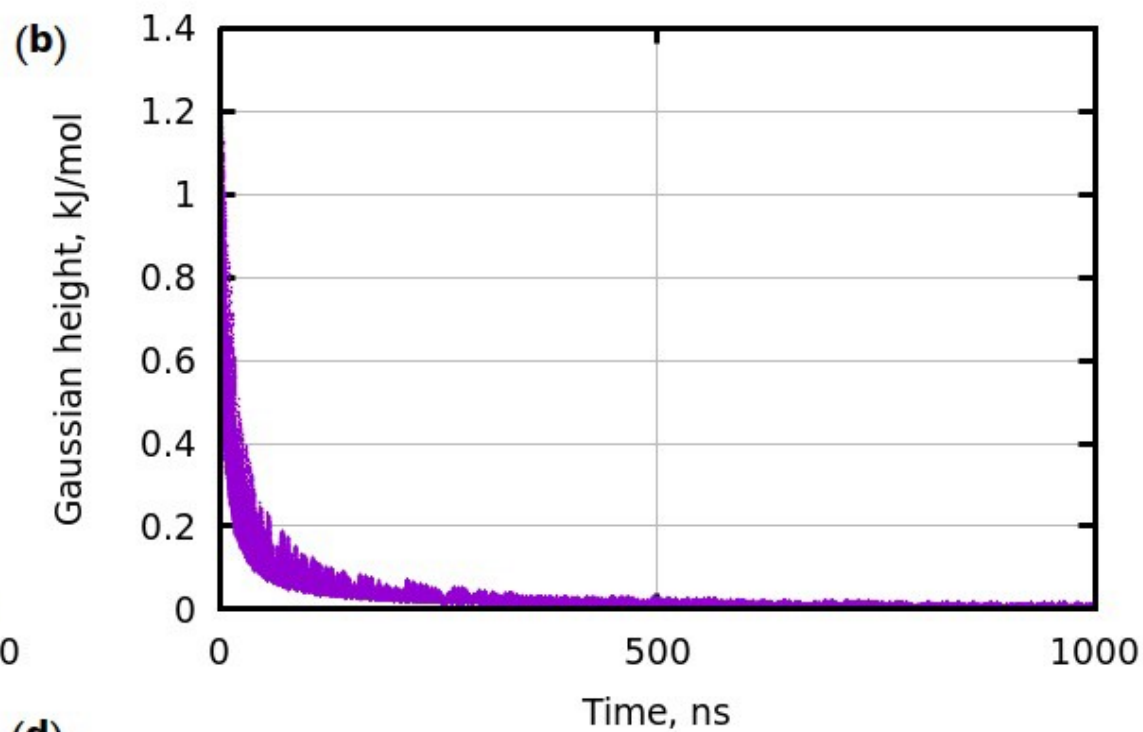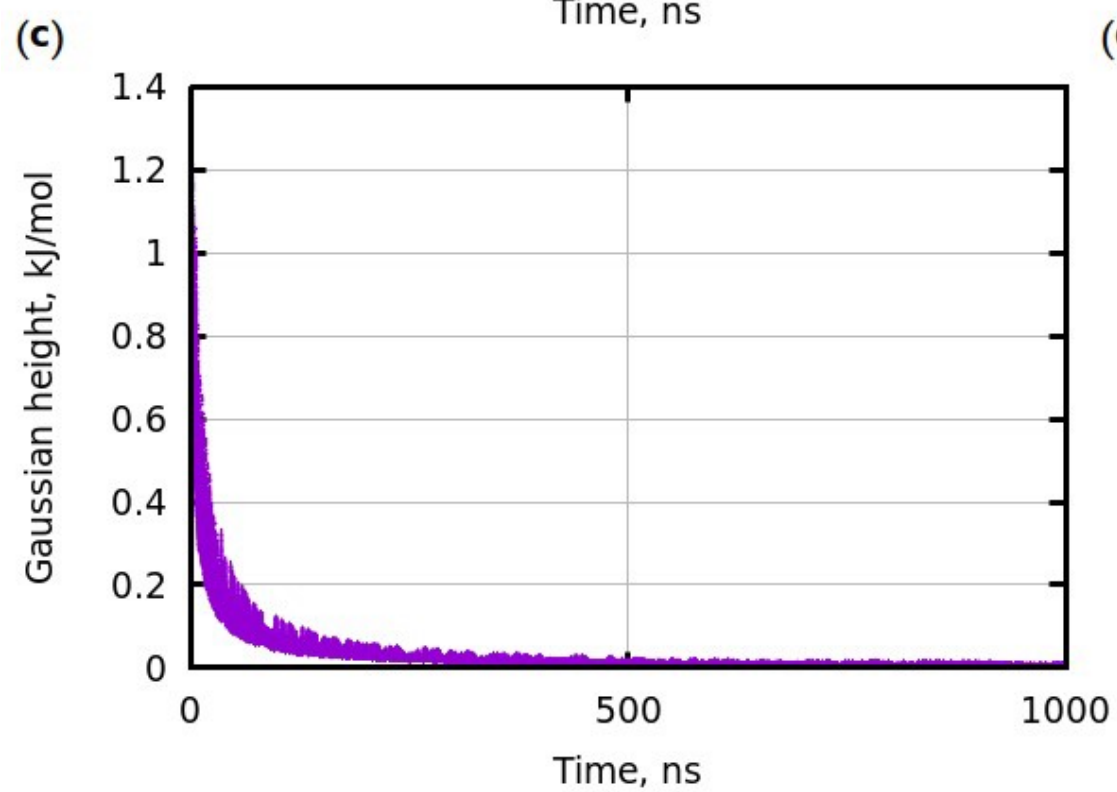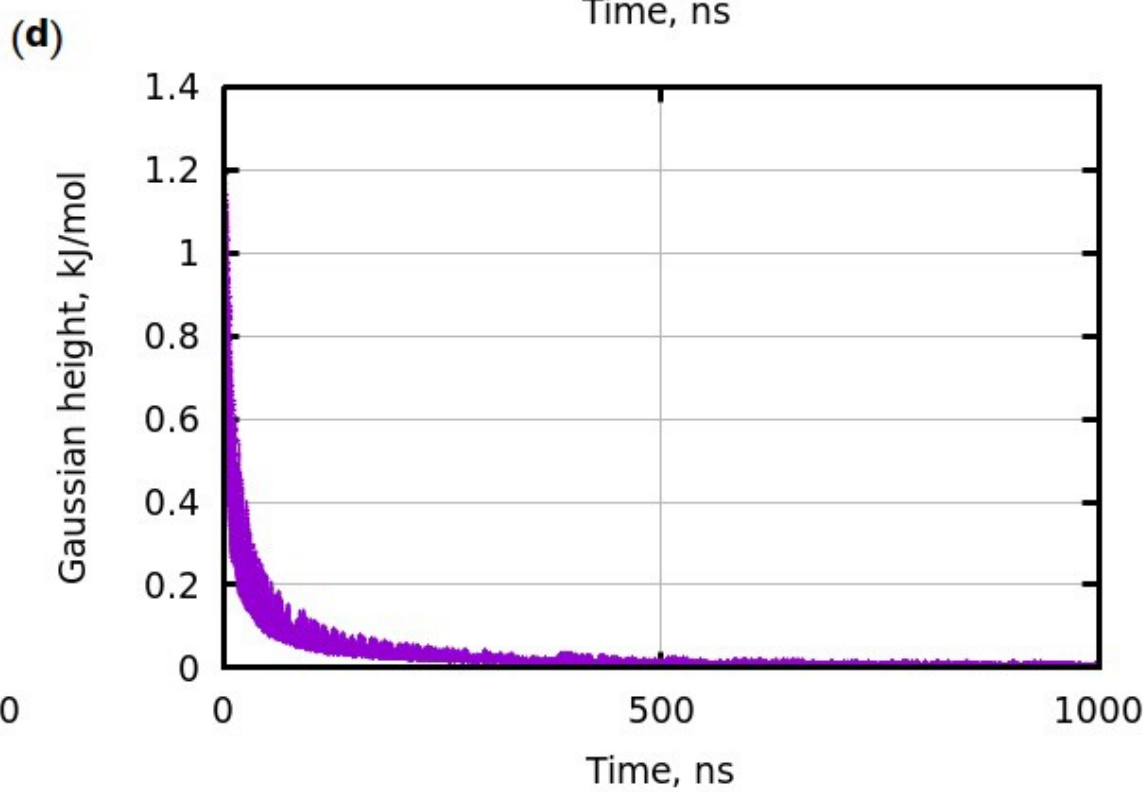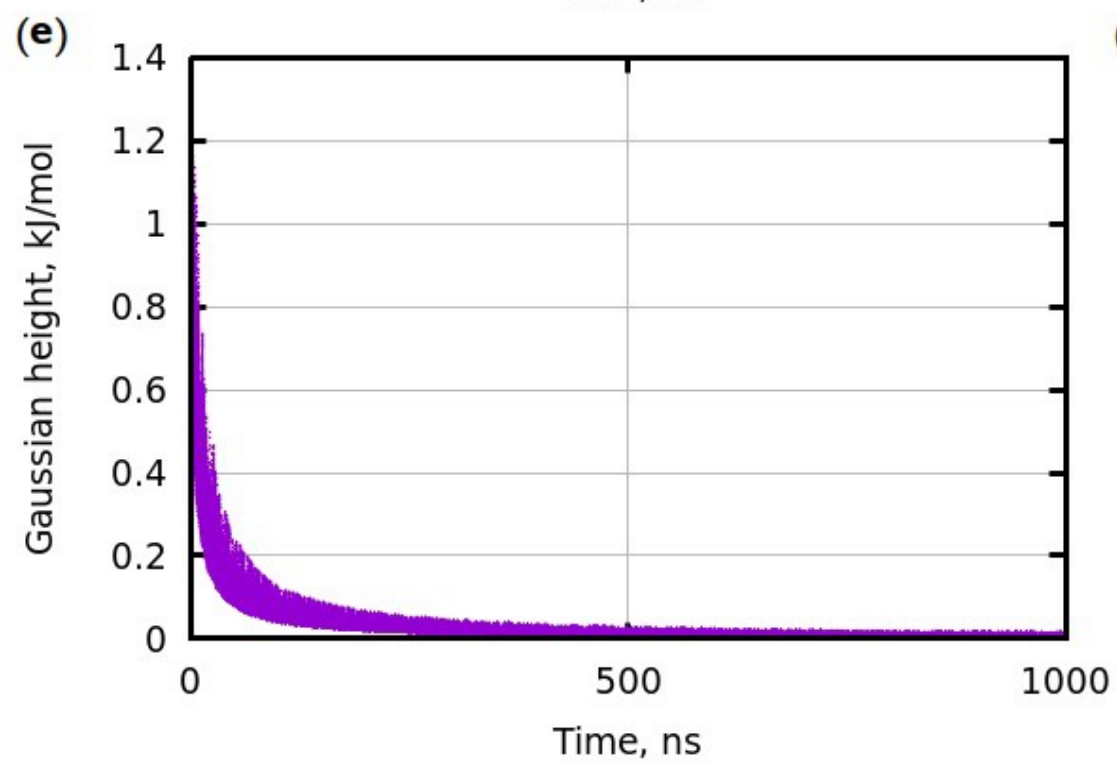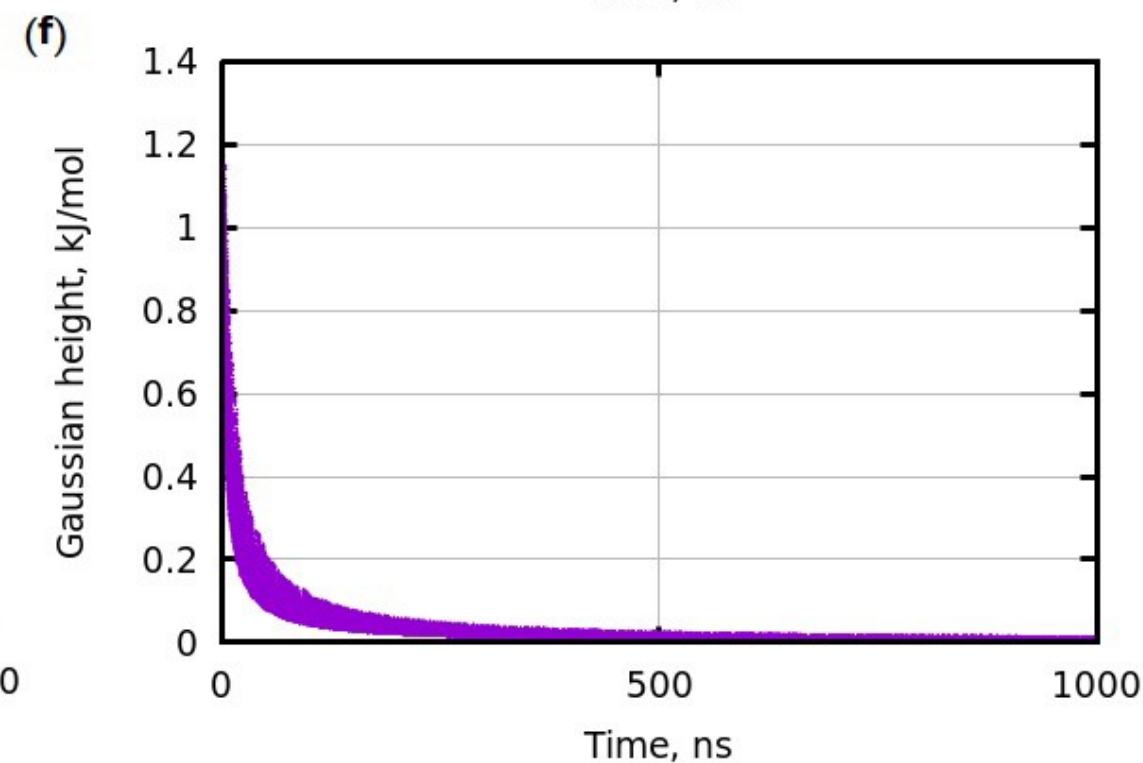

Supplement: d3cp02639f3.pdf [file d3cp02639f3.pdf]

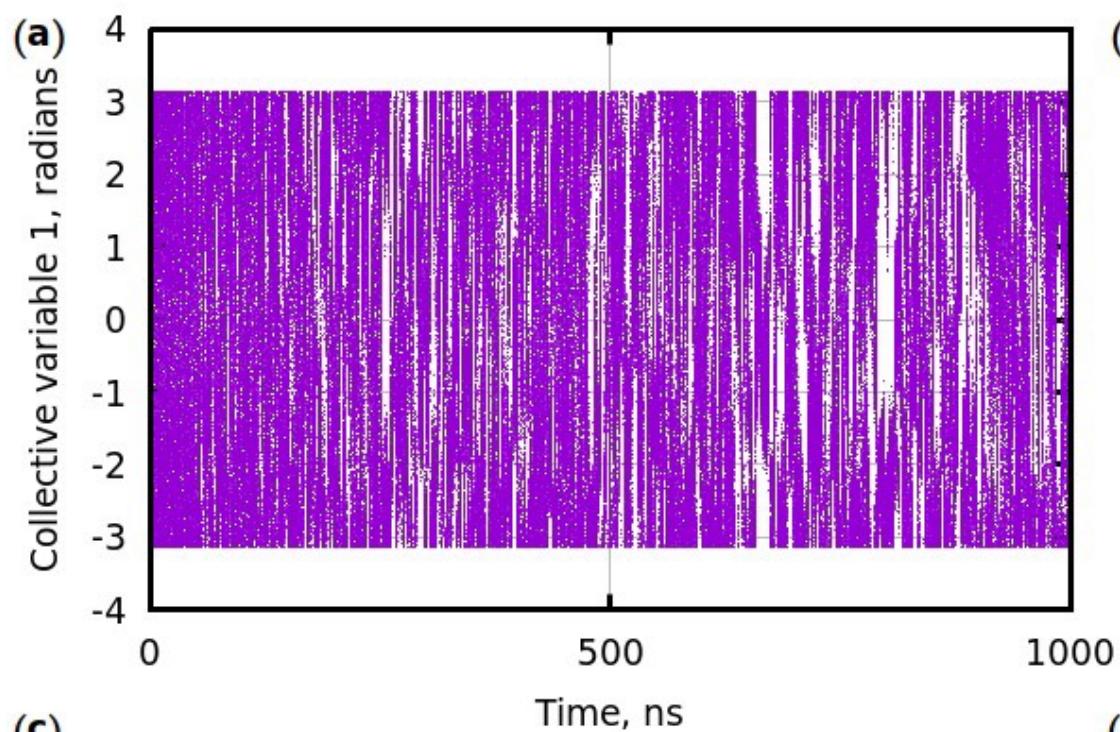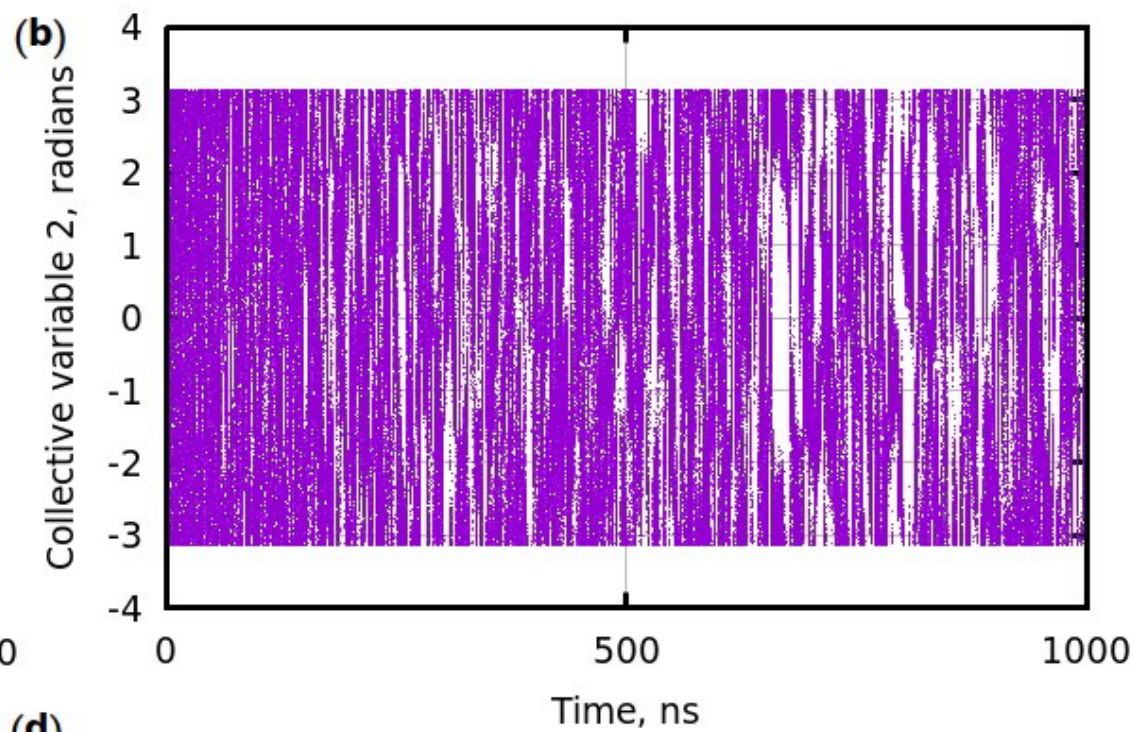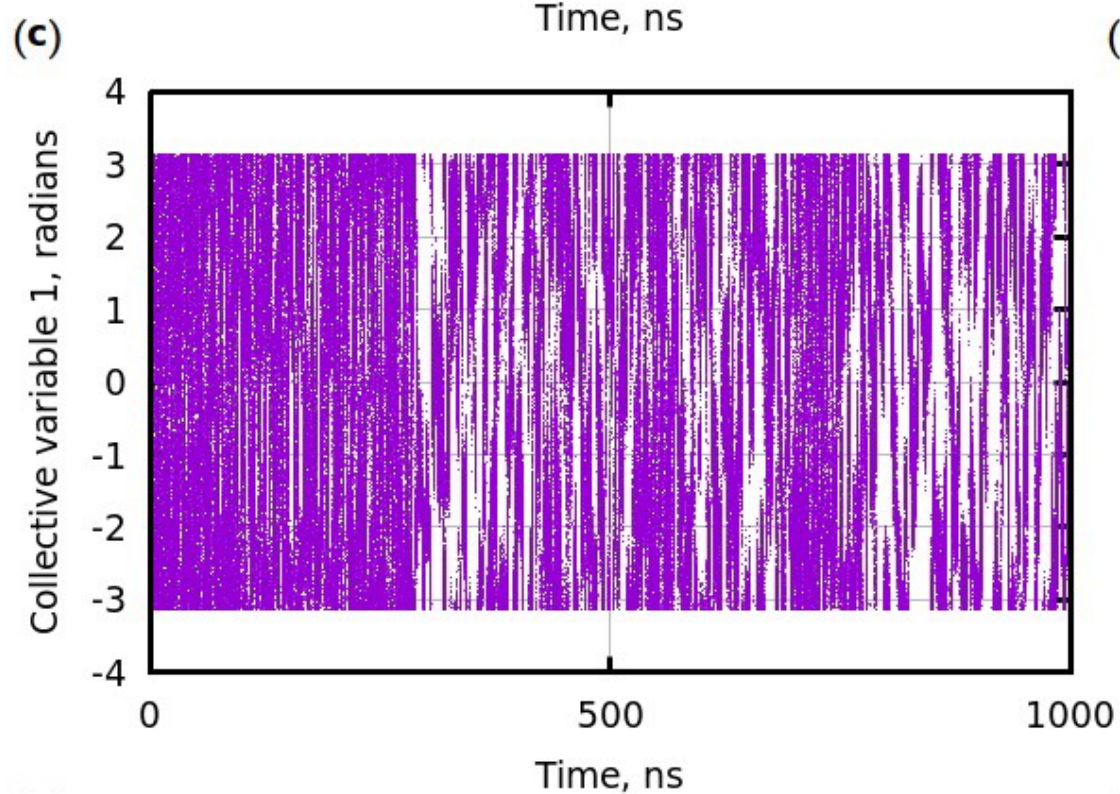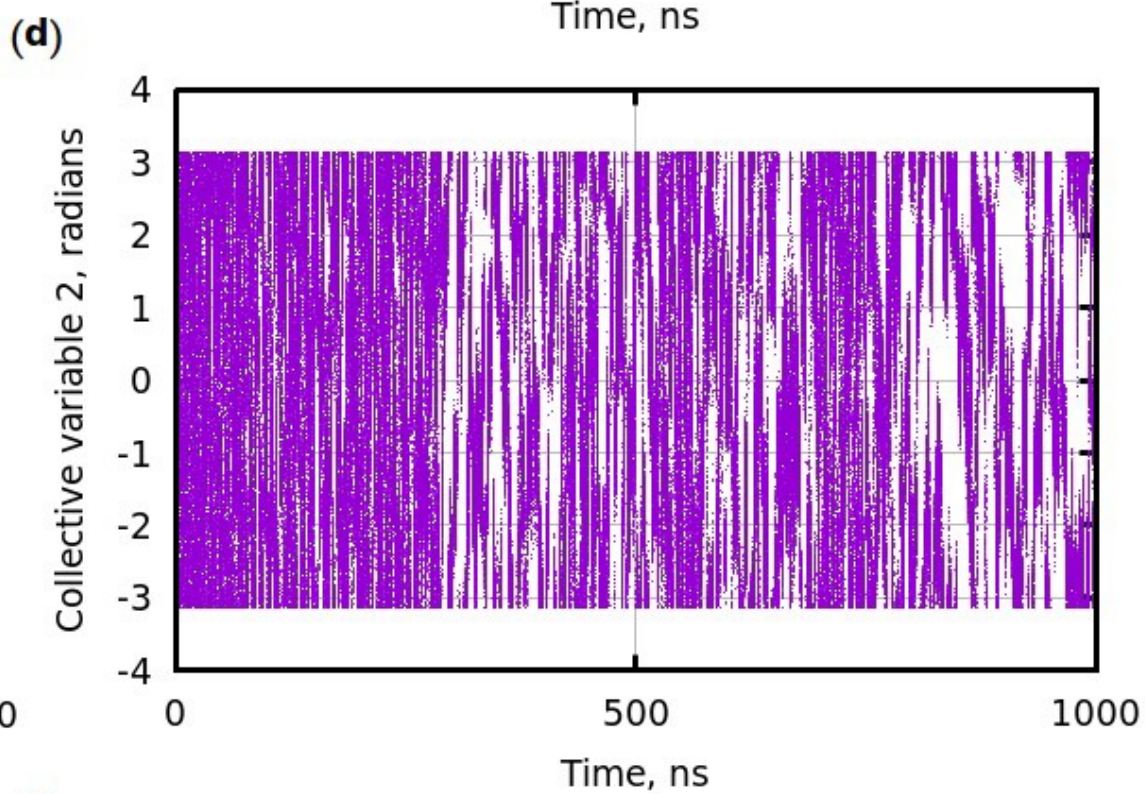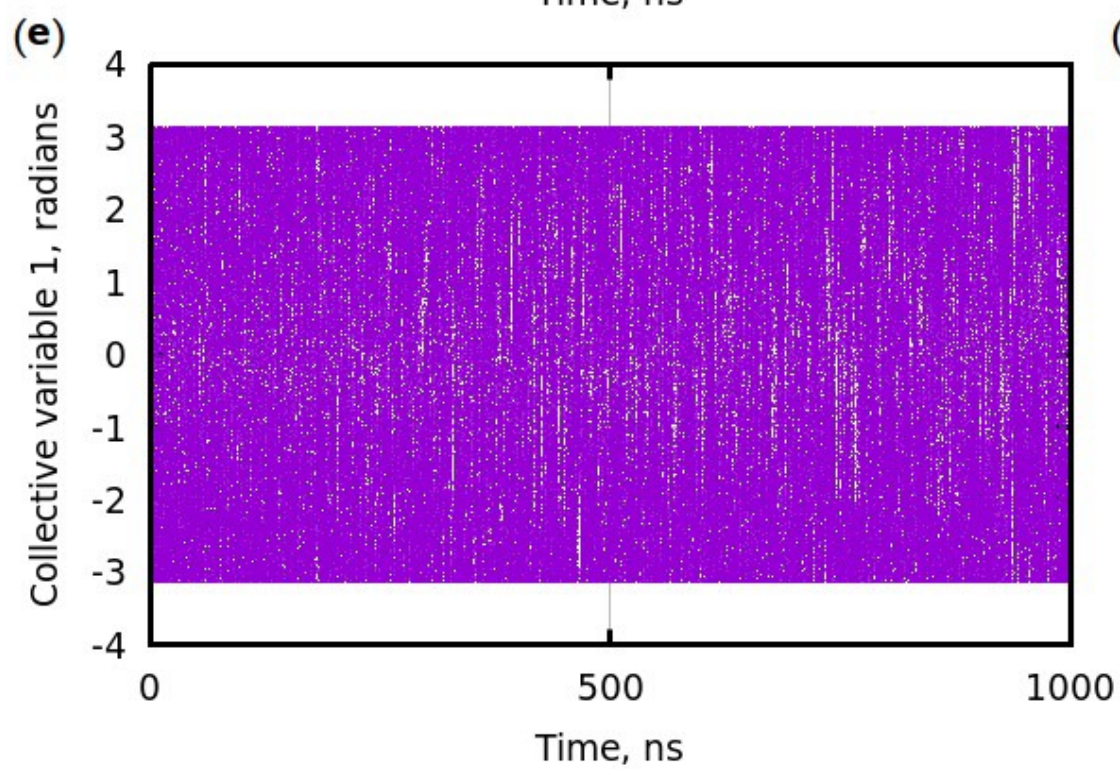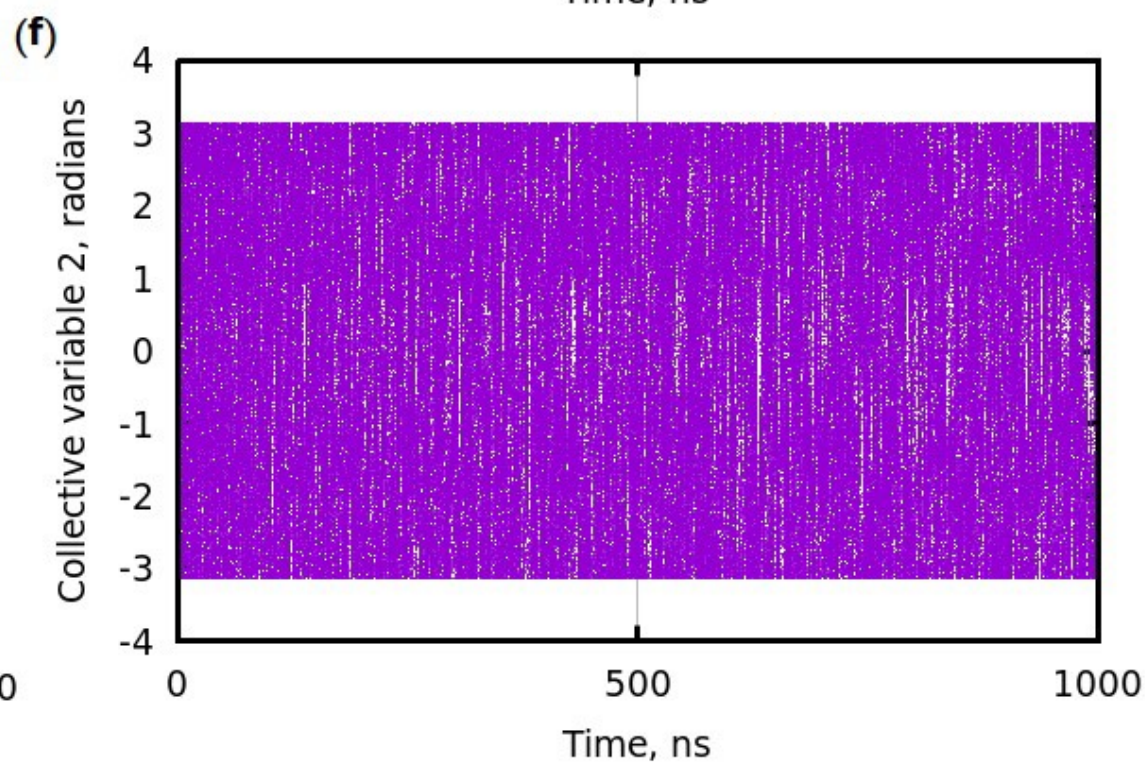

Supplement: d3cp02639f4.pdf [file d3cp02639f4.pdf]

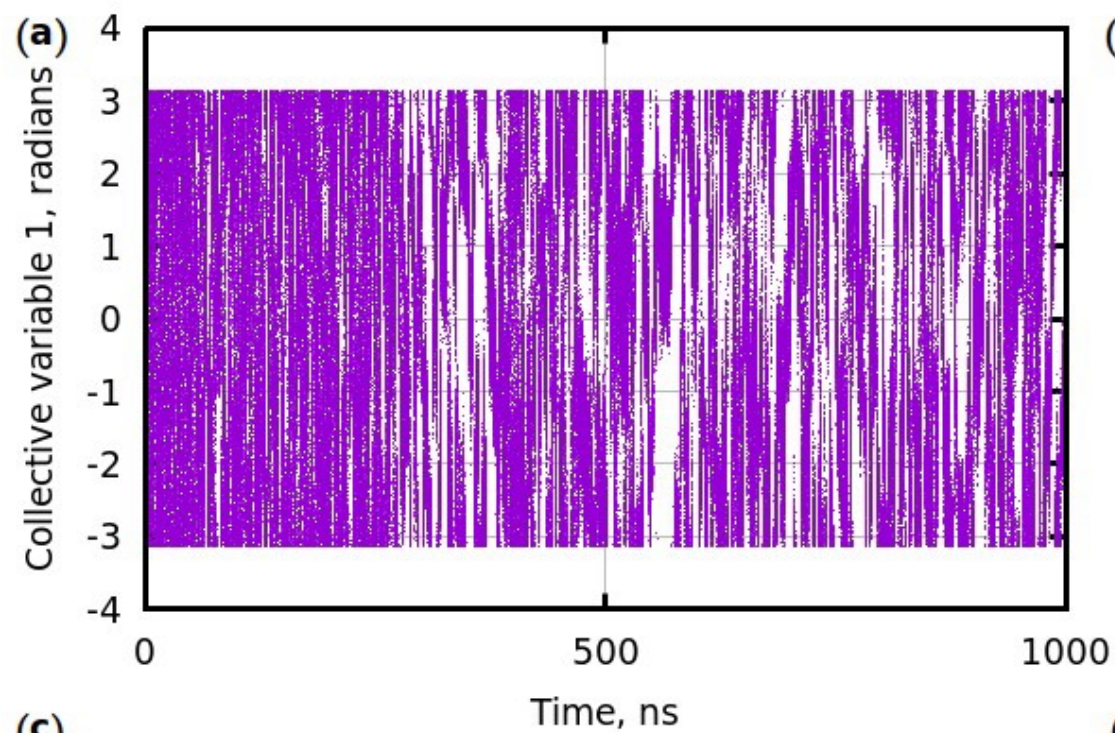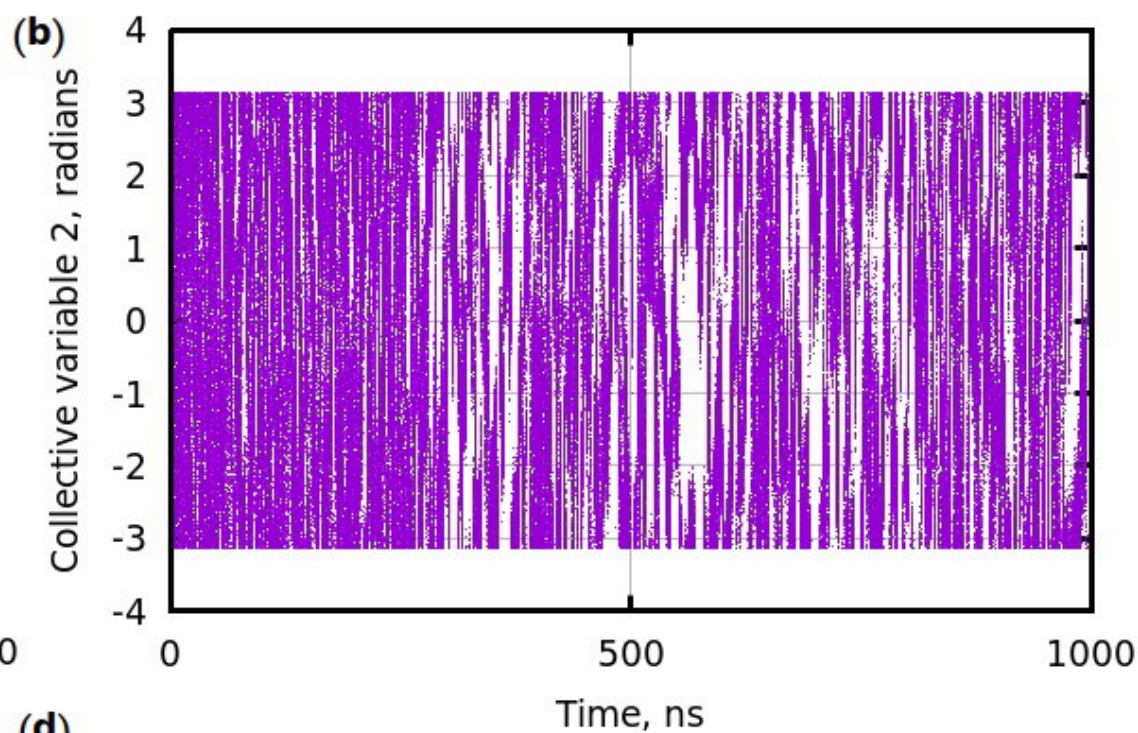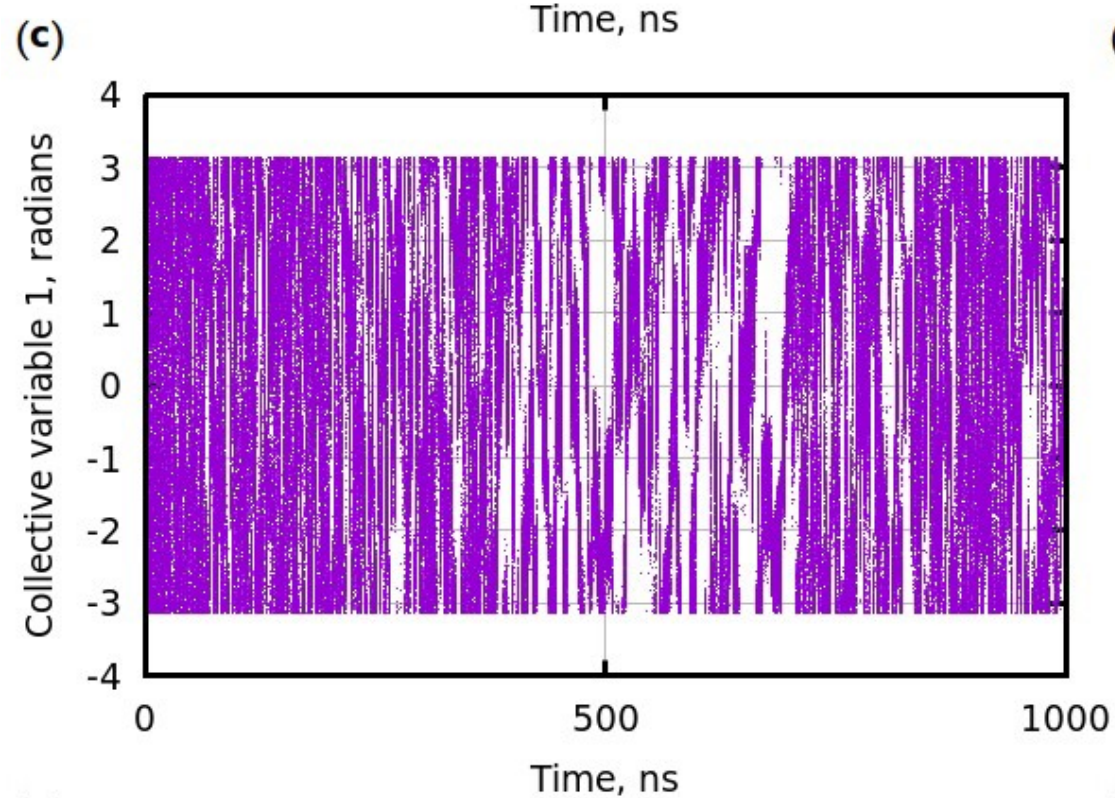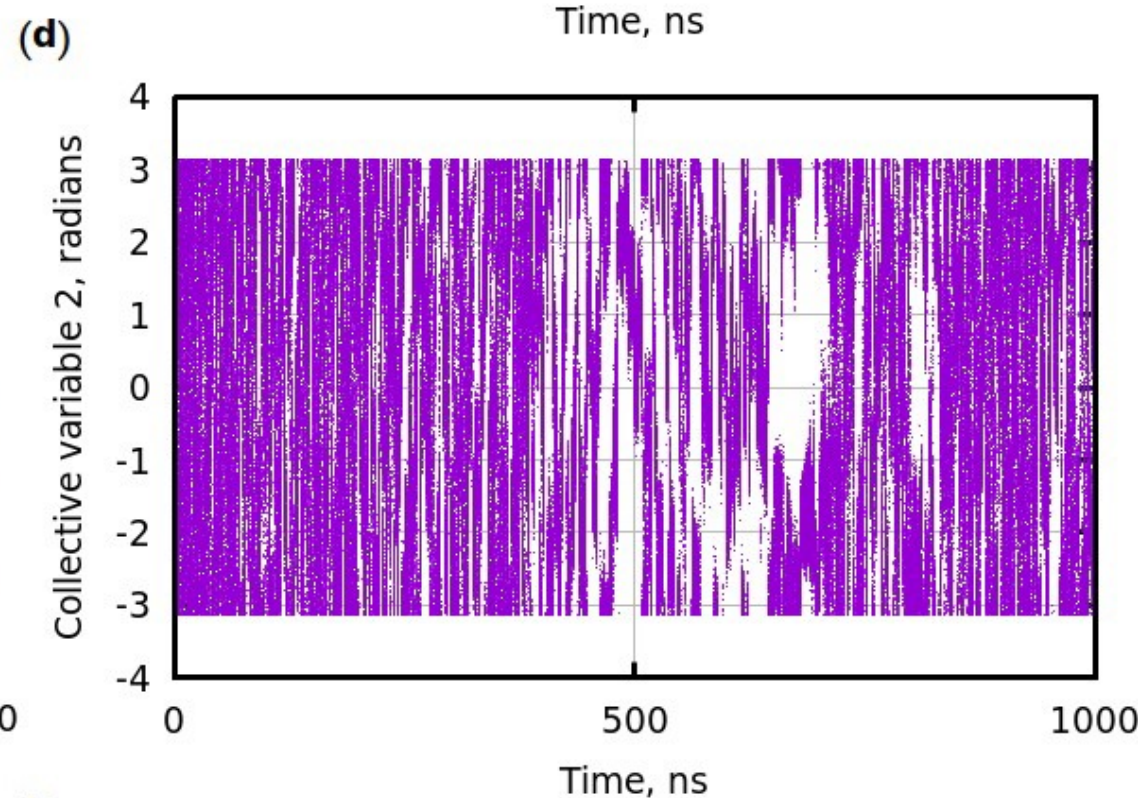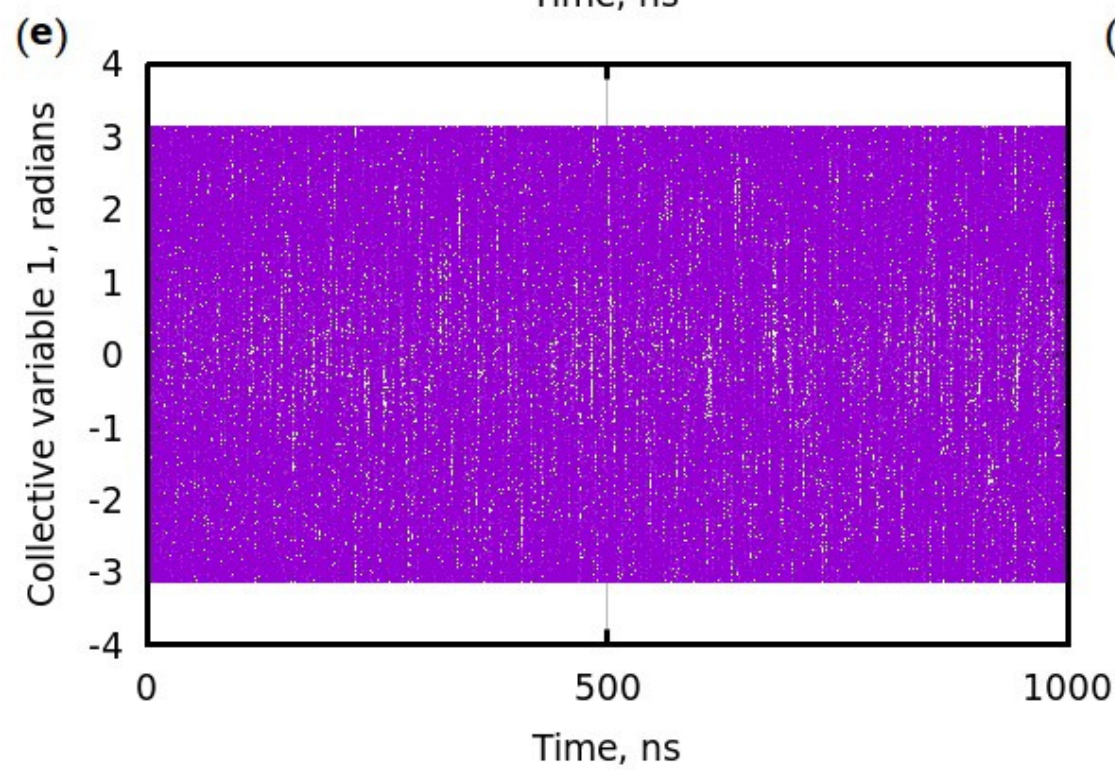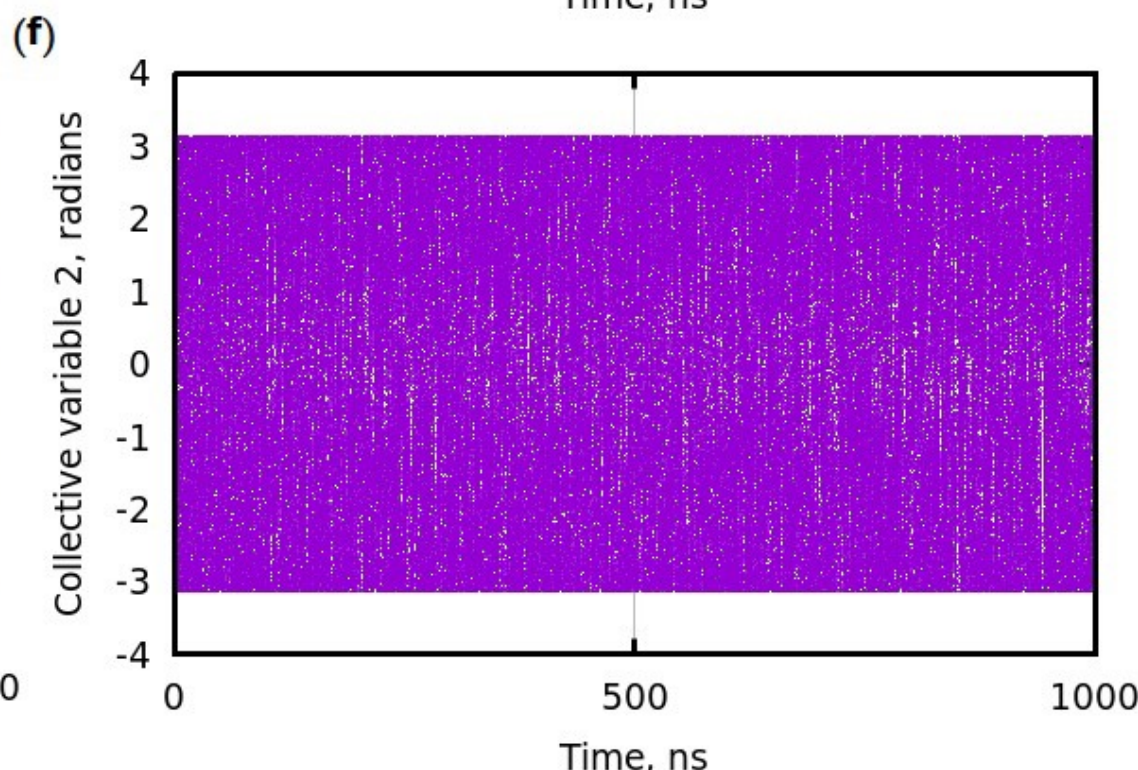

Supplement: d3cp02639f5.pdf [file d3cp02639f5.pdf]

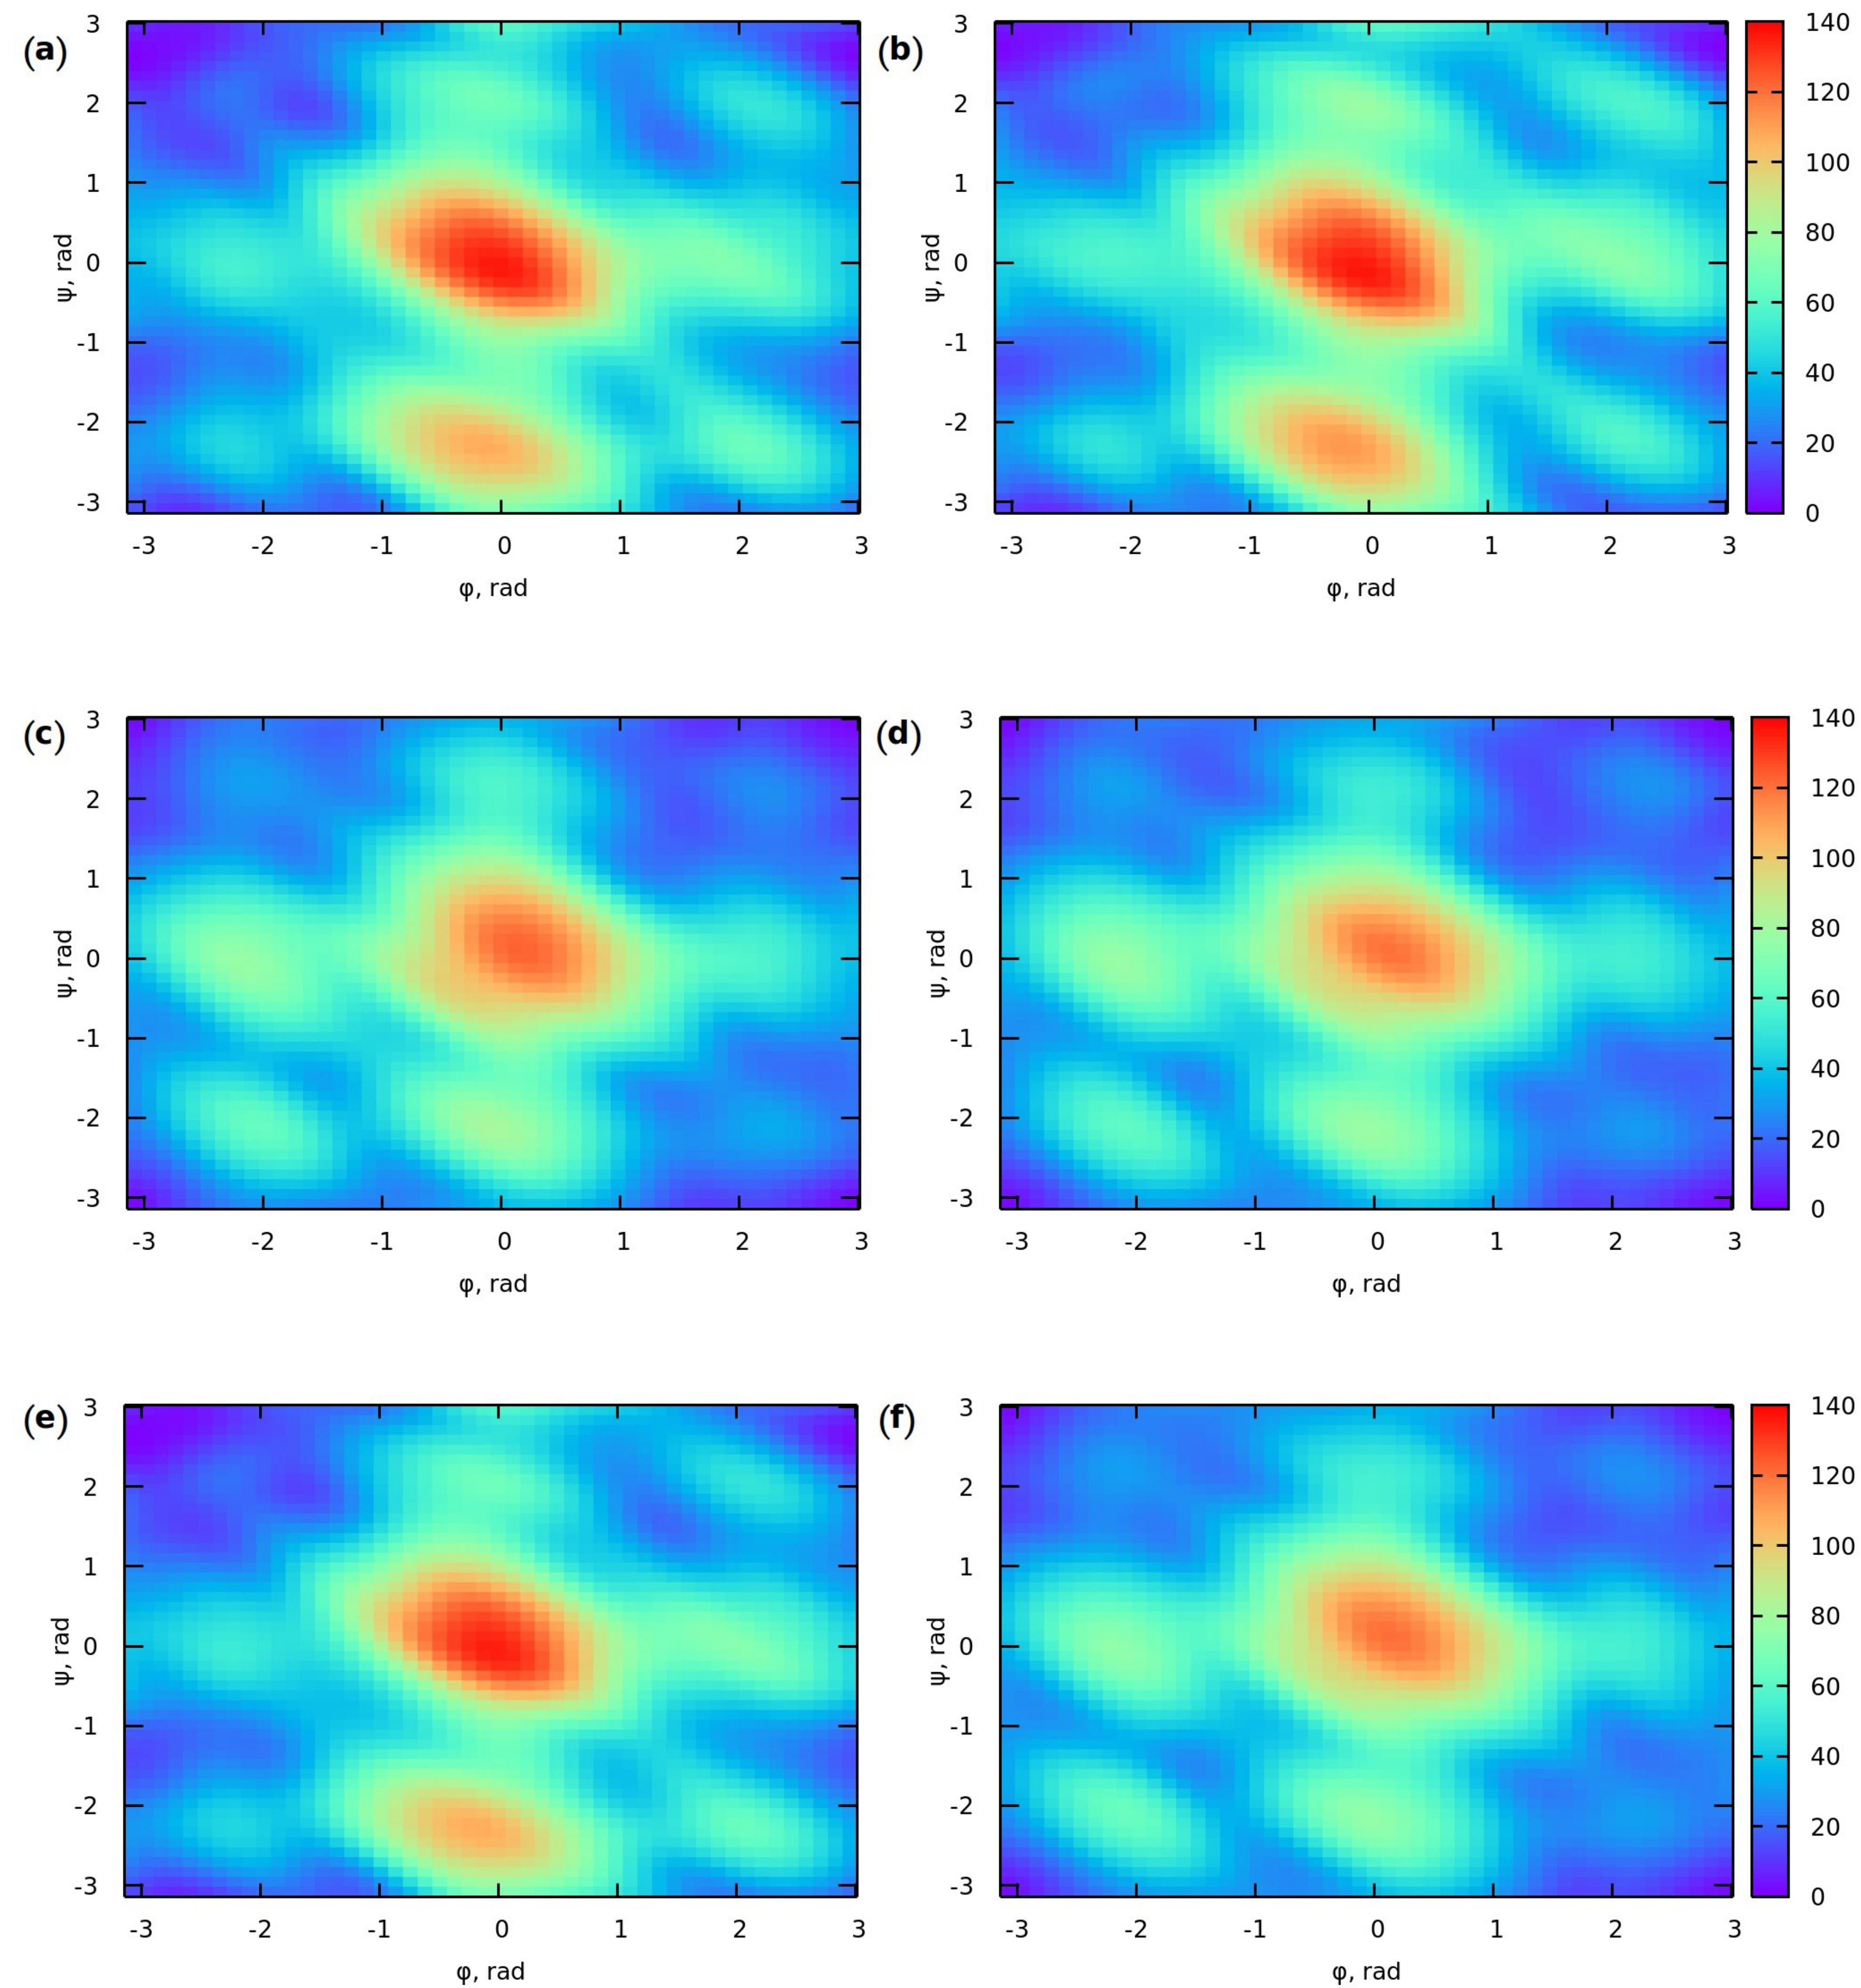

Supplement: d3cp02639f6.pdf [file d3cp02639f6.pdf]
